# Supplementary material
Source: bioRxiv or medRxiv preprint supplement (https://medrxiv.org/highwire/filestream/81090/field_highwire_adjunct_files/0/2020.05.14.20102491-1.pdf)
Supplement: Supplementary file [file 2020.05.14.20102491-1.pdf]

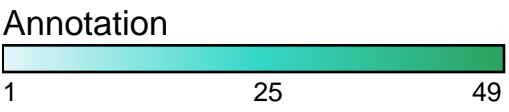

- 01-Control
- 02-COVID+ Low IL6
- 03-COVID+ Medium IL6
- 04-COVID+ High IL6

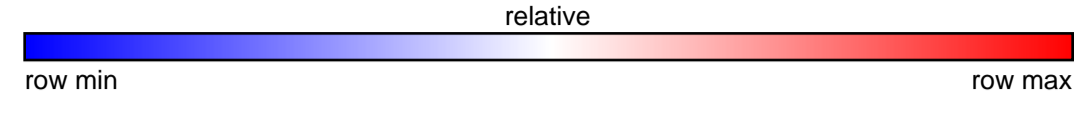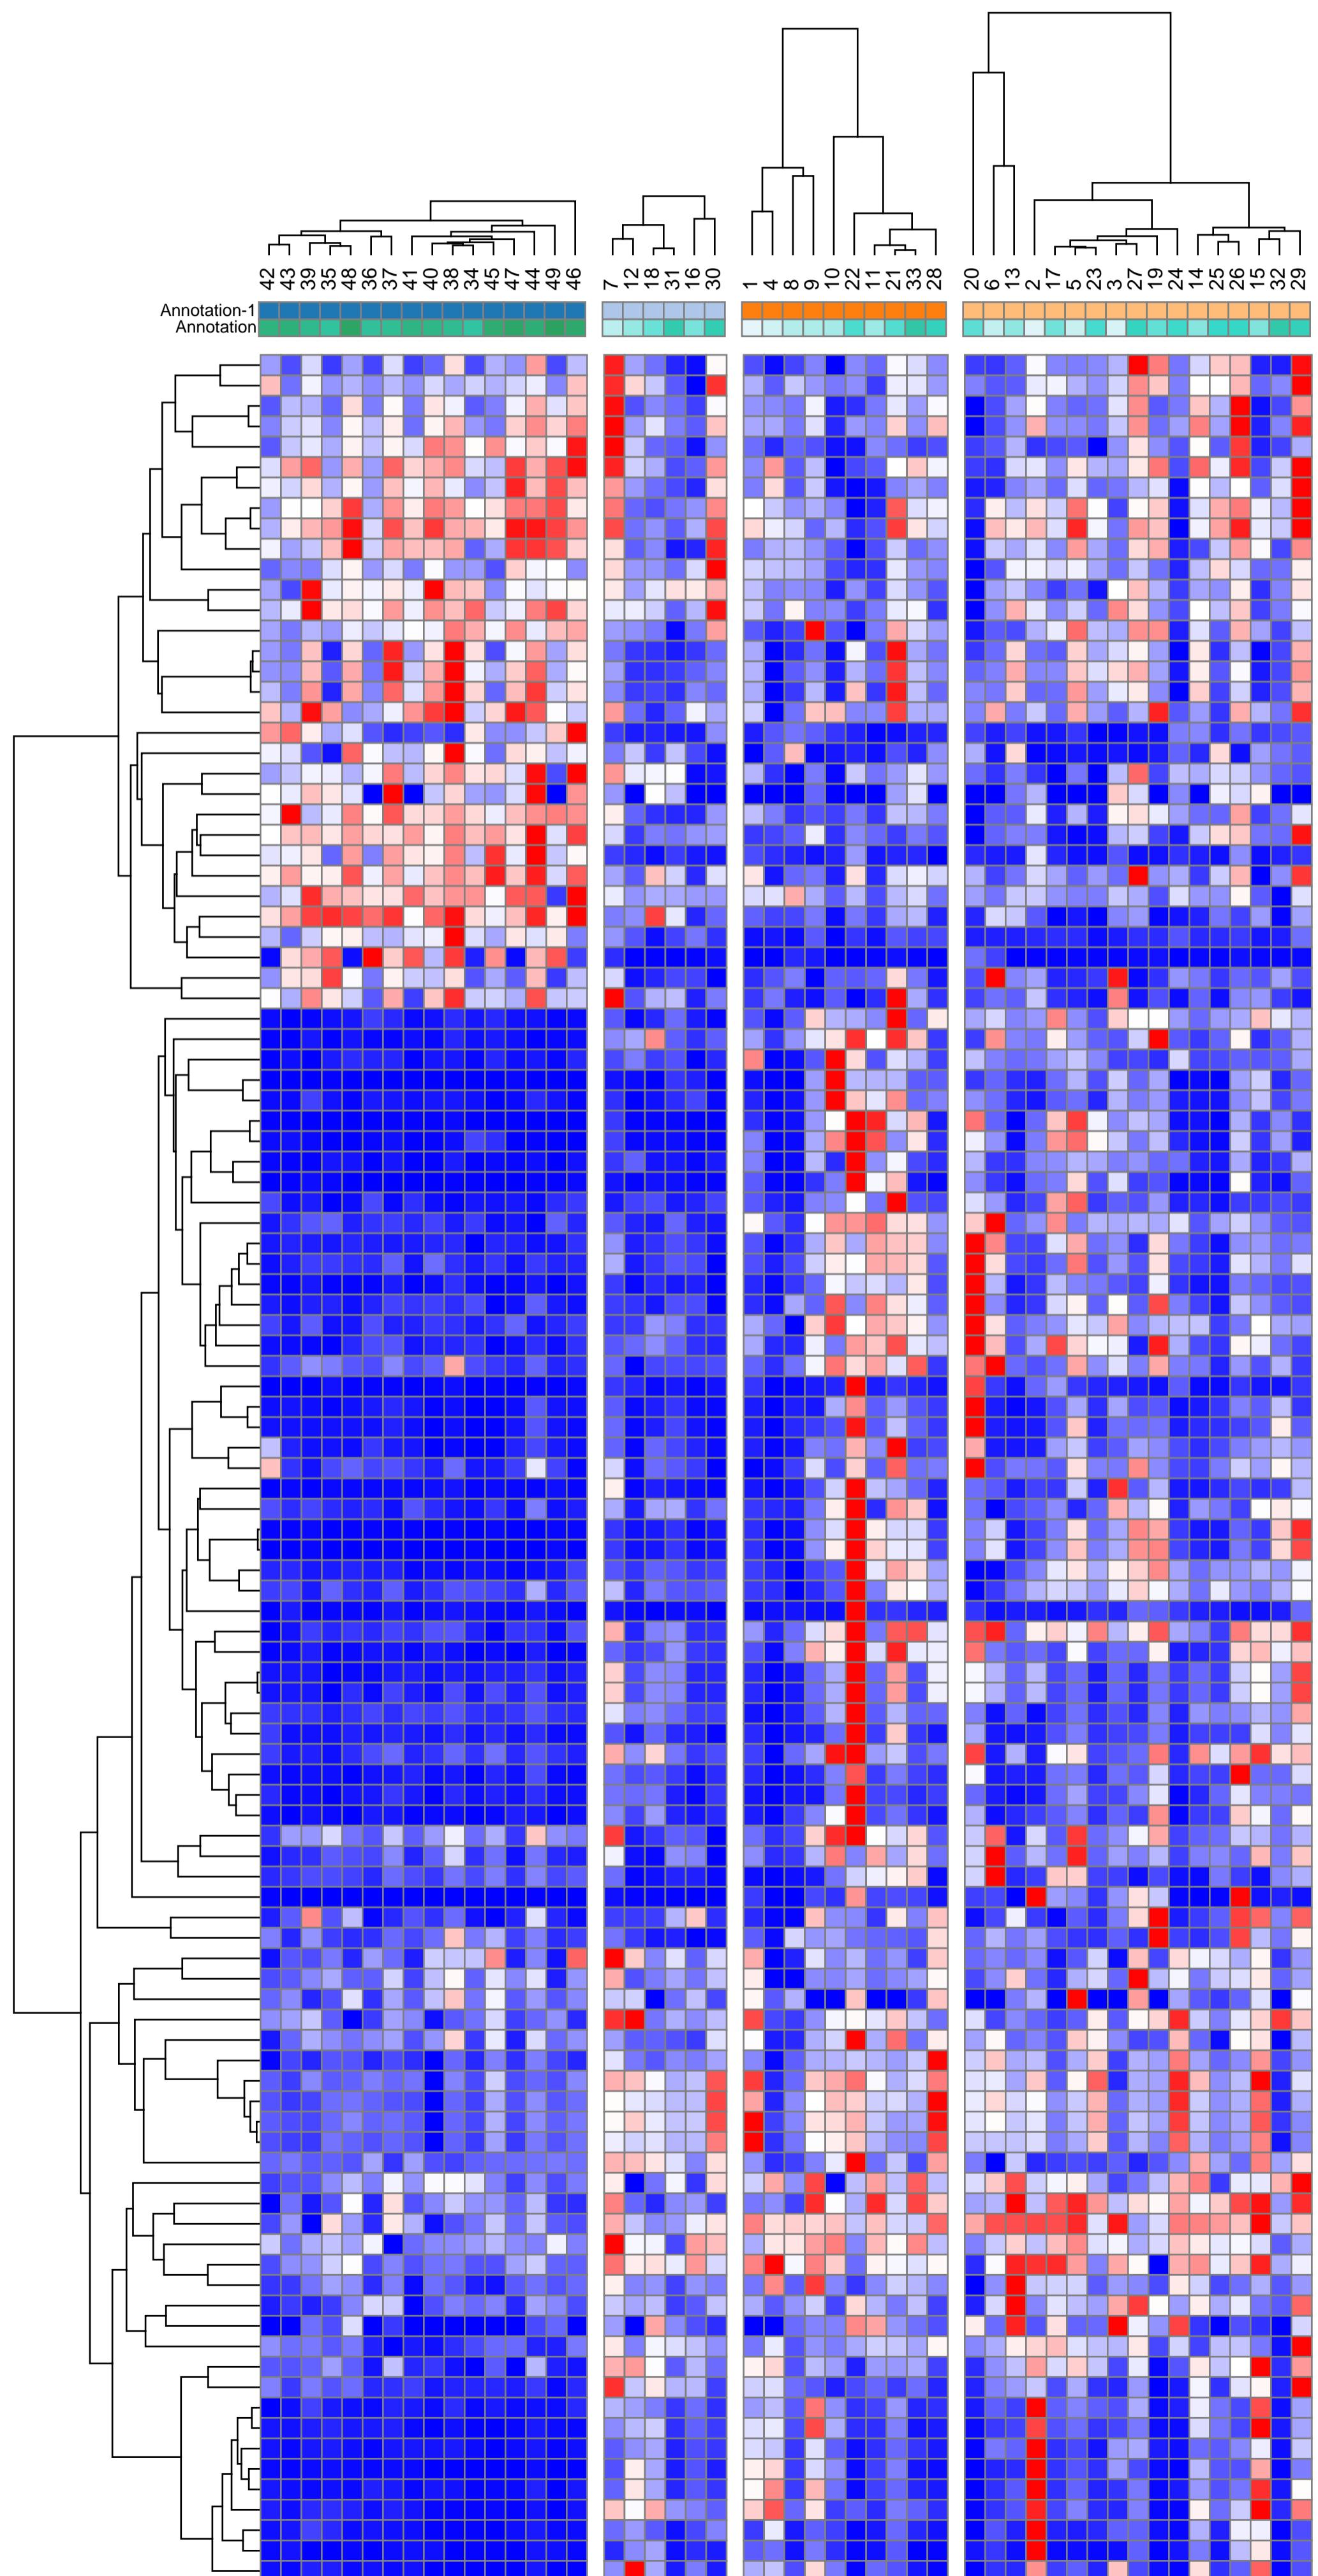

- Annotation
- L-methionine
  - Guanine
  - L-lysine
  - 2-Oxo-7-methylthioheptanoic acid
  - L-alanine
  - L-threonine
  - dAMP
  - L-glutamine
  - 5-Oxoproline
  - 3-Oxalomalate
  - (5-L-Glutamyl)-L-glutamine
  - glycine
  - L-serine
  - L-proline
  - Allantoate
  - Ornithine
  - gamma-Glutamyl-Se-methylselenocysteine
  - L-Citrulline
  - L-cysteine
  - D-Rhamnose
  - Lactate
  - q-Oxalo-crotonate
  - L-histidine
  - L-tryptophan
  - Protein 5-hydroxylysine
  - 10-Hydroxydecanoic acid
  - Nonanoic acid (pelarqonate)
  - Taurine
  - Guanidinoacetate
  - Anthranilate
  - 2/3-Phospho-D-glycerate
  - Glycerol 3-phosphate
  - Kynurenine
  - N1-Acetylspermidine
  - Maltotriose
  - Cytidine
  - N-Carbamyl-L-glutamate
  - Pyridoxal
  - 4-Acetamidobutanoate
  - Cystathionine
  - Phosphocreatine
  - Picolinic acid
  - N-acetyl-D-glucosamine
  - Inosine
  - Hypoxanthine
  - N-Acetylneuramate
  - Octenylcarnitine
  - Malonylcarnitine
  - 6-Pyruvoyltetrahydropterin
  - Diethanolamine
  - Maltose/Sucrose
  - Hydroxyoctanoyl carnitine
  - Hydroxydecanoyl carnitine
  - Octanoylcarnitine
  - Decanoylcarnitine
  - D-Arabitol/Xylitol/Ribitol
  - Acetylcarnitine
  - alpha-D-Ribose 1-phosphate
  - D-Glucuronate
  - Creatine
  - Methylenediurea
  - Dodecanedioylcarnitine
  - Asymmetric dimethyl arginine
  - N-Acyl-D-glutamate
  - Butyrylcarnitine
  - Isobutyryl-L-carnitine
  - L-Carnitine
  - Hexanoylcarnitine
  - Propanoyl-carnitine
  - Tiaryl carnitine
  - Isovalerylcarnitine
  - Hydroxyisovaleroyl carnitine
  - 2-Hydroxyglutarate
  - Dehydroascorbate
  - N-Acetyl-L-citrulline
  - Kynurenic acid
  - trans-4-Hydroxy-L-proline
  - Indole-3-acetate
  - Pyruvate
  - Succinate
  - Cys-Gly
  - S-Adenosyl-L-homocysteine
  - Itaconate
  - Thymidine
  - Ascorbate
  - D-Glucose
  - 1-4-beta-D-Xylan
  - 2-Methyleneqlutarate
  - L-Adrenaline
  - Phosphoserine
  - Nicotinic acid
  - Mercaptopyruvate
  - L-arginine
  - Hexadecanoic acid
  - Octadecanoic acid
  - L-phenylalanine
  - D-Fructose 1-6-bisphosphate
  - Dodecanoic acid
  - Tetradecanoic acid
  - Tetradecenoic acid
  - Sphingosine 1-phosphate
  - Octadecenoic acid
  - Eicosatetraenoic acid
  - Octadecadienoic acid
  - (8Z-11Z-14Z)-Icosatrienoic acid
  - Hexadecenoic acid
  - Docosahexaenoic acid
  - (7Z-10Z-13Z-16Z-19Z)-Docosa-7-10-13-16-19-pentaenoic acid
  - Octadecatrienoic acid
